# Supplementary material for: Gold nanorods as a theranostic platform for in vitro and in vivo imaging and photothermal therapy of inflammatory macrophages
Source: Royal Society of Chemistry journal article supplement (doi:10.1039/c5nr02521d), 2015-01-01
Supplement: c5nr02521d1.pdf [file c5nr02521d1.pdf]

## Supplementary Information

### Gold nanorods as a theranostic platform for *in vitro* and *in vivo* imaging and photothermal therapy of inflammatory macrophages

Jinbao Qin<sup>a1</sup>, Zhiyou Peng<sup>a1</sup>, Bo Li<sup>b1</sup>, Kaichuang Ye<sup>a</sup>, Yuxin Zhang<sup>b</sup>, Fukang Yuan<sup>a</sup>, Xinrui Yang<sup>a</sup>, Lijia Huang<sup>a</sup>, Junqing Hu<sup>b\*</sup>, Xinwu Lu<sup>ac\*</sup>

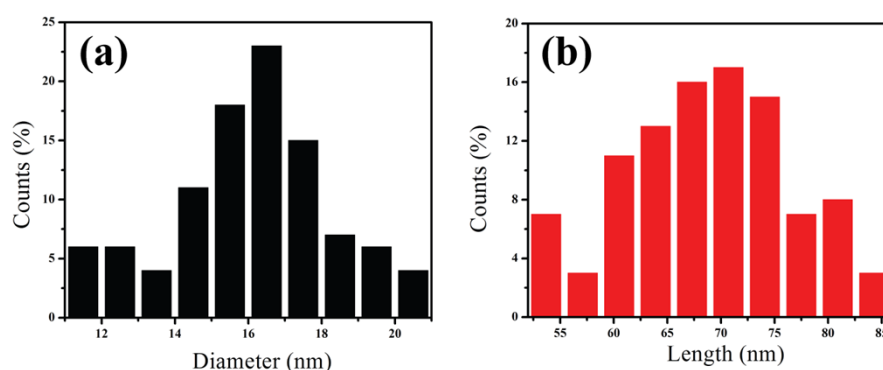

**Figure S1.** Diameter (a) and length (b) of the Au NRs.

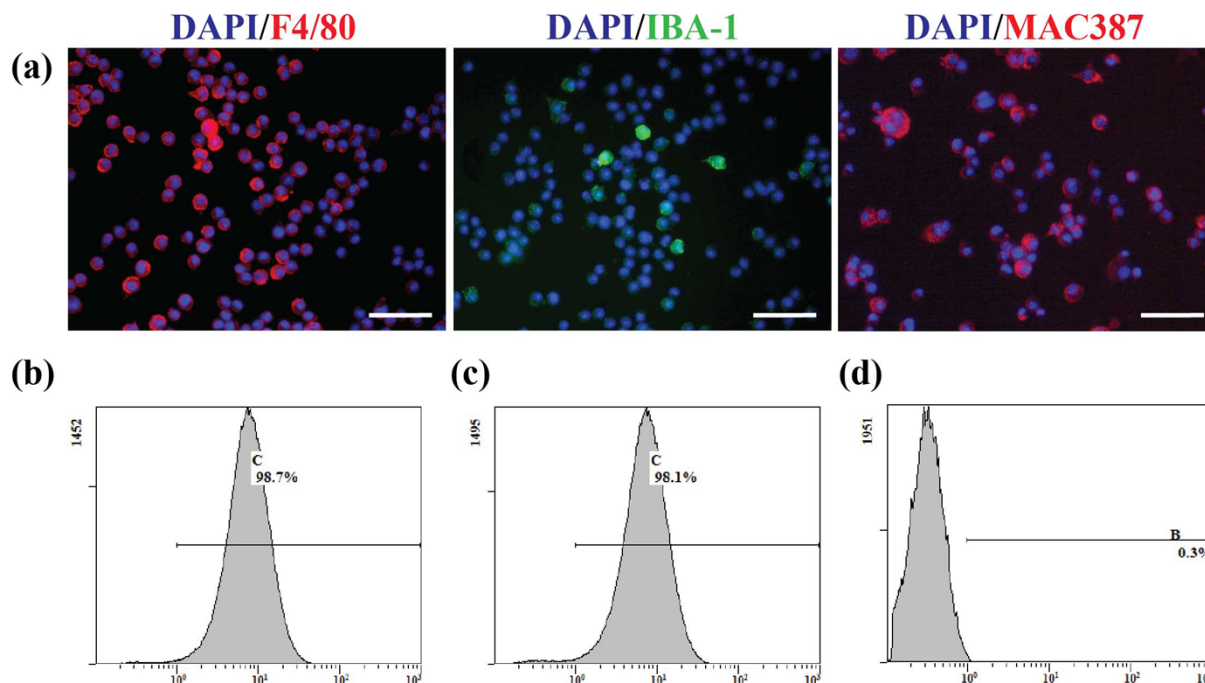

**Figure S2.** Characterization of Ana-1 cells. Immunofluorescence staining showed that more than 97% of the Ana-1 cells expressed the macrophage specific markers F4/80 (red), Iba-1 (green) and MAC-3 (red), and the nuclei were stained with DAPI (blue, a). Flow cytometric

analysis of Ana-1 cells were strongly positive for the macrophages surface antigens F4/80 ( $98.7\% \pm 0.37\%$ , b) and CD11b ( $98.1\% \pm 0.23\%$ , c) compared with the control groups ( $0.3\% \pm 0.02\%$ , d). Scale bar measures  $100\ \mu\text{m}$ .

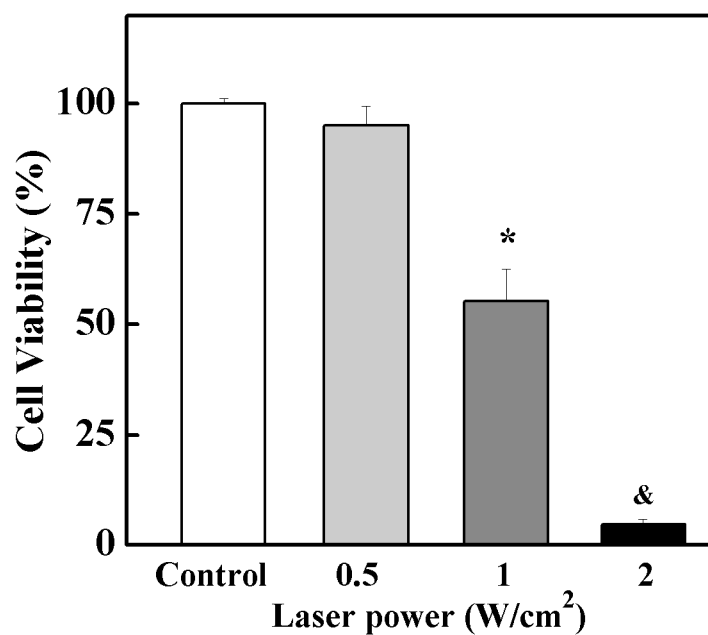

**Figure S3.** Relative viabilities of Ana-1 cells after Au NRs-induced photothermal ablation at different laser power densities ( $0.5$ ,  $1$  and  $2\ \text{W}/\text{cm}^2$ ) after calcein AM and PI staining.
